# Supplementary material for: Induction of Rosette-to-Lumen stage embryoids using reprogramming paradigms in ESCs
Source: PubMed Central journal article supplement (PMC8677818; doi:10.1038/s41467-021-27586-w), 2021-12-16
Supplement: 41467_2021_27586_MOESM1_ESM.pdf [file 41467_2021_27586_MOESM1_ESM.pdf]

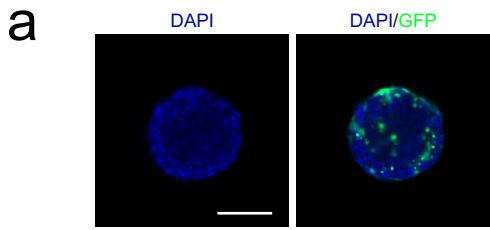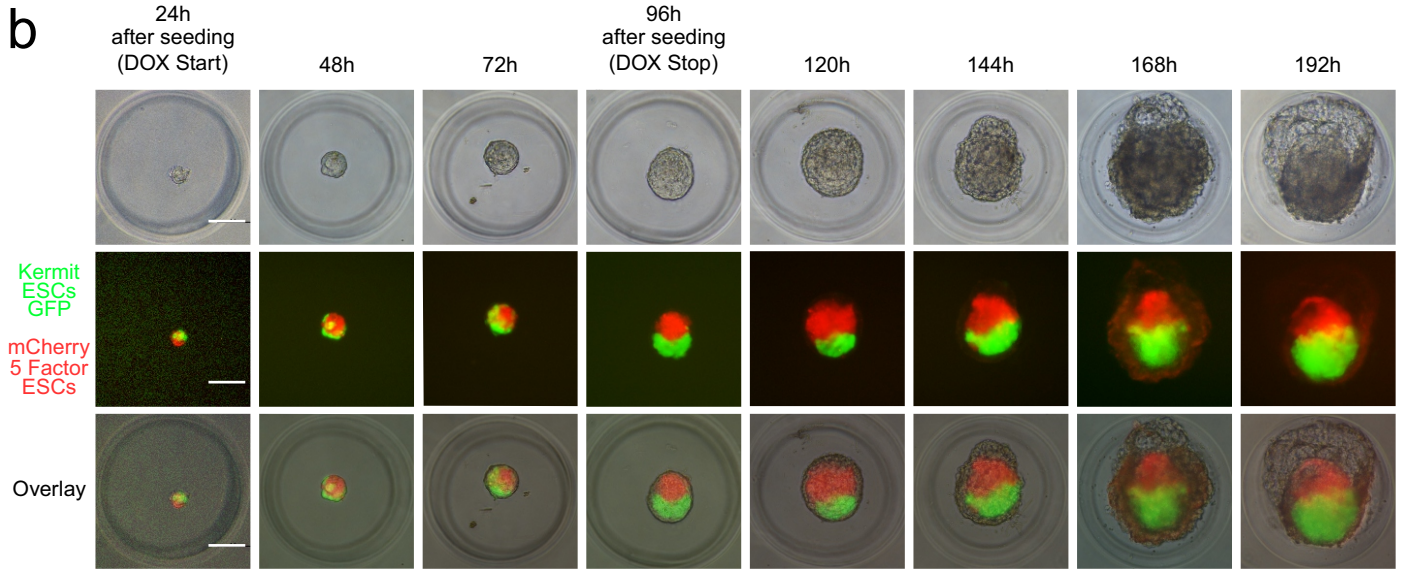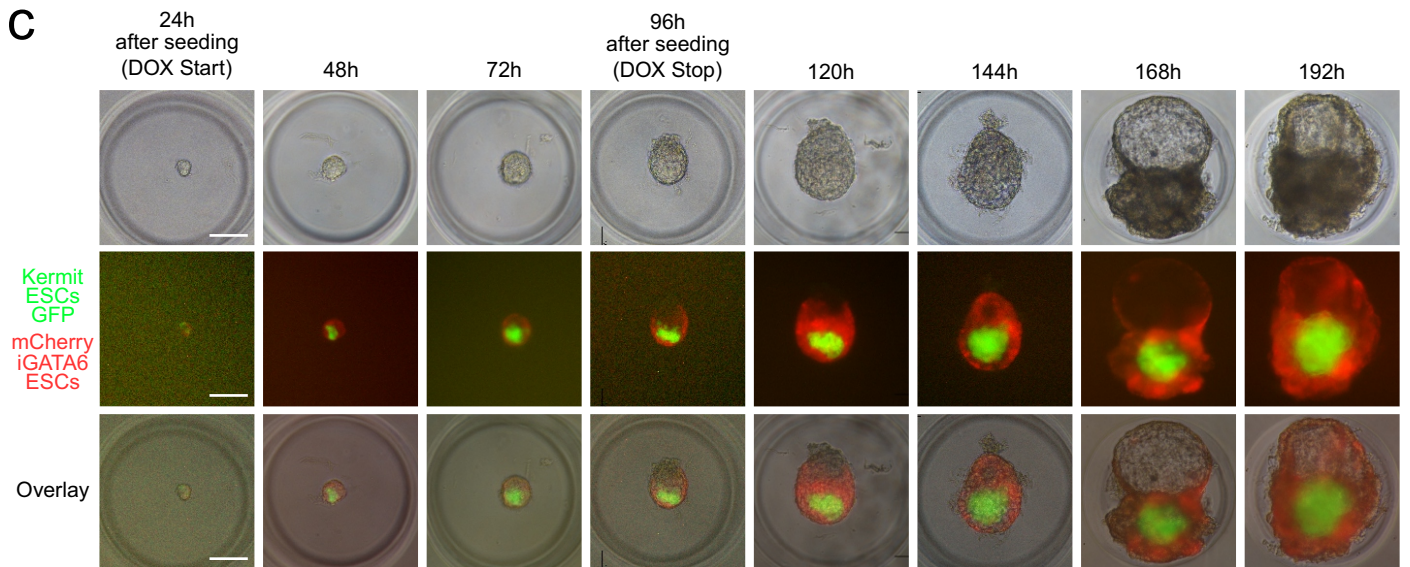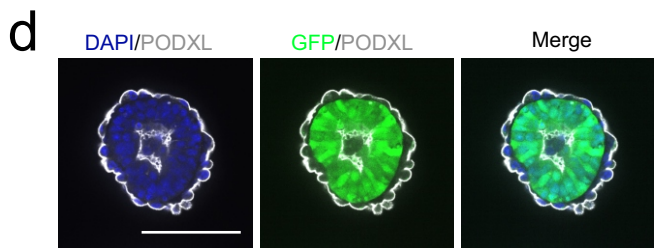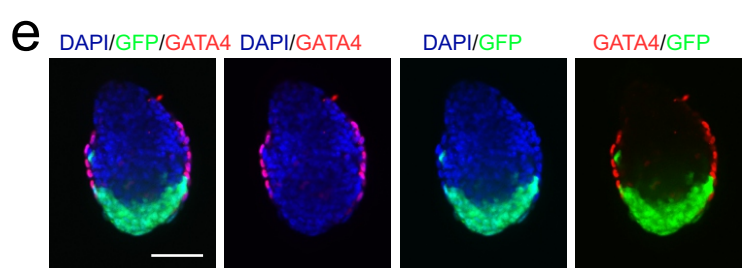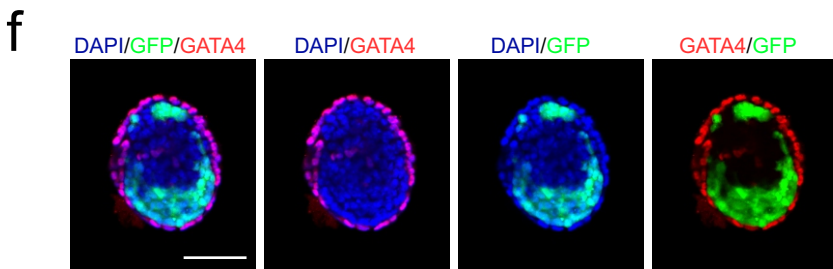

### Supplementary Figure 1 – Development of RtL-embryoids over time

**a** Image of aggregate composed of Kermit ESCs, 5 Factor ESCs and iGATA6 ESCs and cultured without DOX supplementation, showing random distribution and localization of GFP+ Kermit ESC and a complete lack of self-organization. GFP, green; DAPI, blue. Scale bar = 100  $\mu\text{m}$  **b** Development of embryo-like structures built from Kermit ESCs, iGATA6 ESCs, and a 5 Factor ESC line transduced with a constitutive mCherry expression cassette. Detection of GFP originating from Kermit ESCs and mCherry from 5 Factor ESCs allows for visualization of self-organization into an epiblast-like (GFP+, green) and extraembryonic ectoderm-like (mCherry+, red) compartment. **c** Development of embryo-like structures built from Kermit ESCs, 5 Factor ESCs and an iGATA6 ESC line transduced with a constitutive mCherry cassette. Detection of GFP originating from Kermit ESCs and mCherry from iGATA6 ESCs allows for visualization of self-organization into an epiblast-like (GFP+, green) and visceral endoderm-like (mCherry+, red) compartment. Scale bars = 100  $\mu\text{m}$ . **d** Aggregate composed of Kermit ESCs and iGATA6 ESCs readily display lumen formation, as indicated by staining against PODXL. Scale bar = 100  $\mu\text{m}$ . GFP, green; PODXL, gray; DAPI, blue. **e** Examples of incomplete or **f** incorrectly assembled structures, that were excluded from analysis. Scale bars = 100  $\mu\text{m}$ . GFP, green; GATA4, red; DAPI, blue. Experiments were repeated independently at least three times with similar results (**a**, **d**, **e**, **f**).

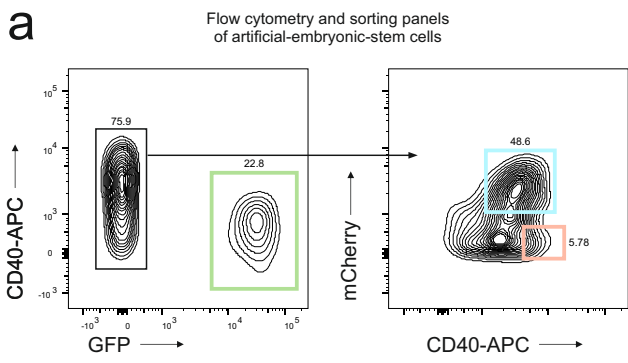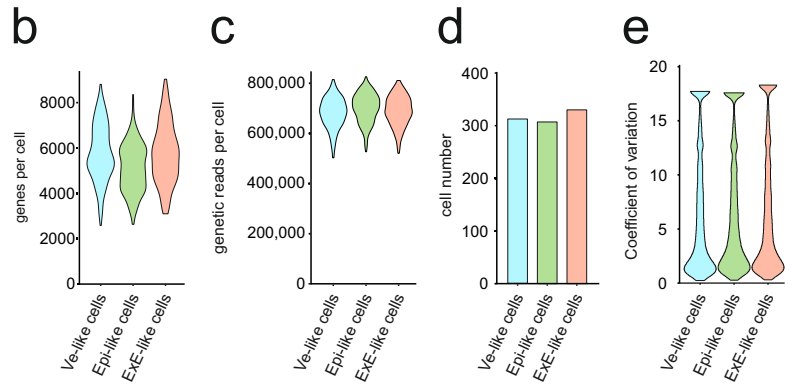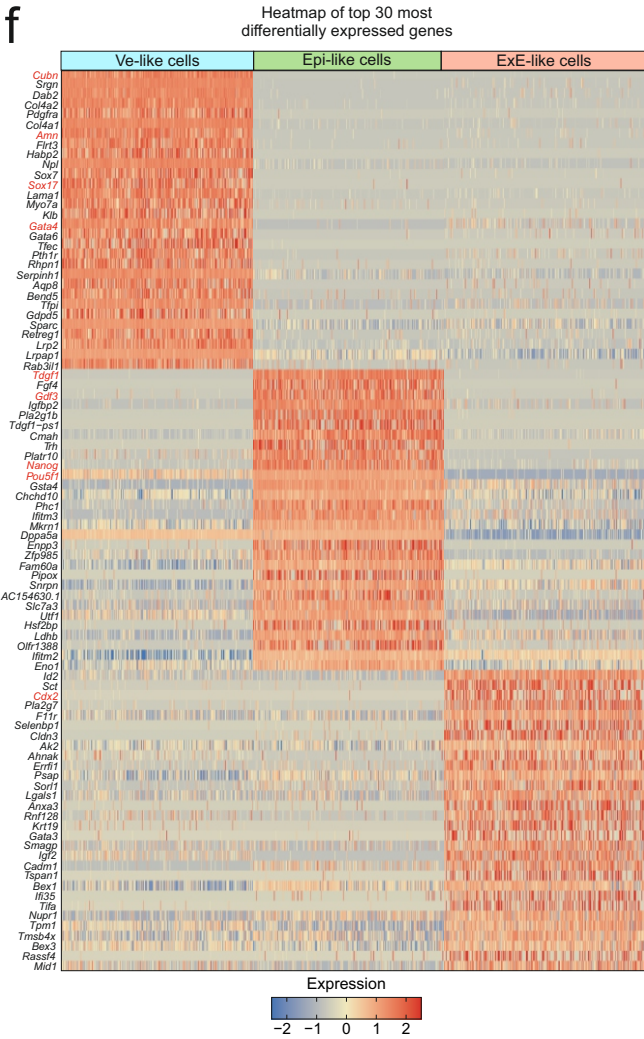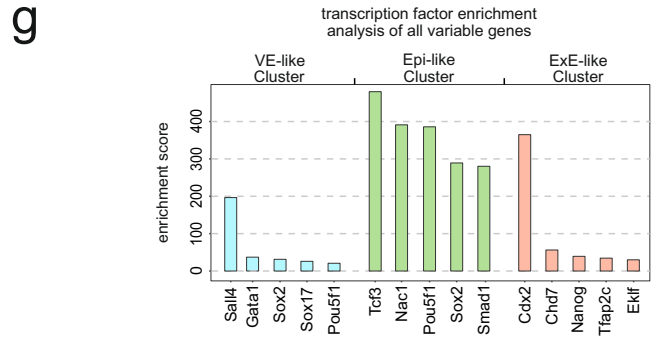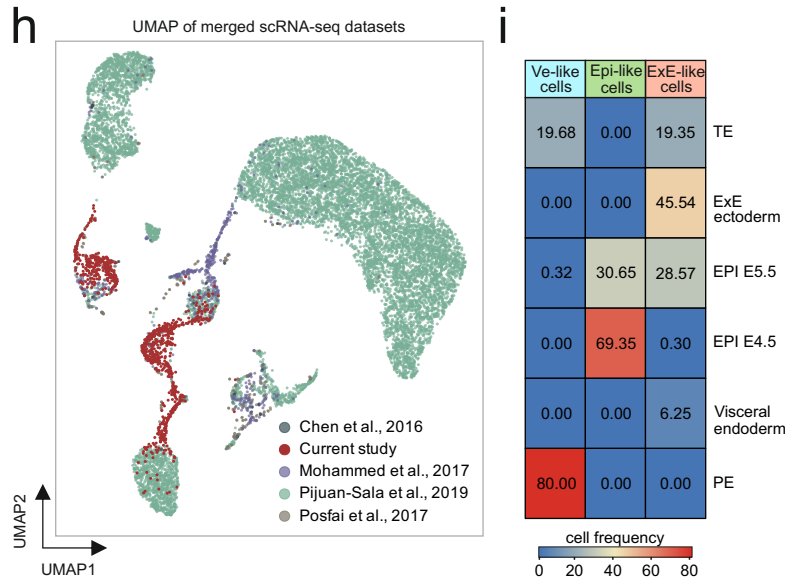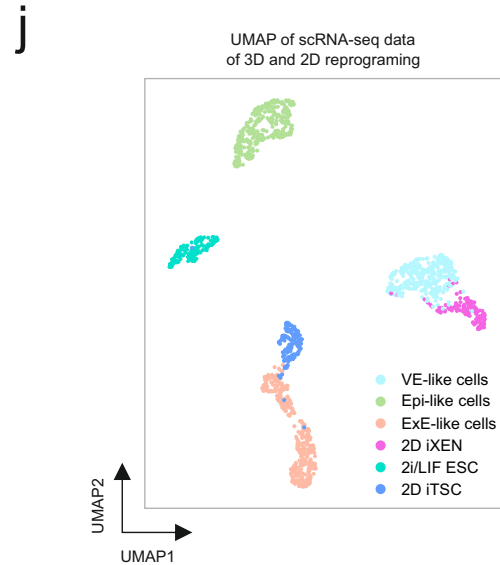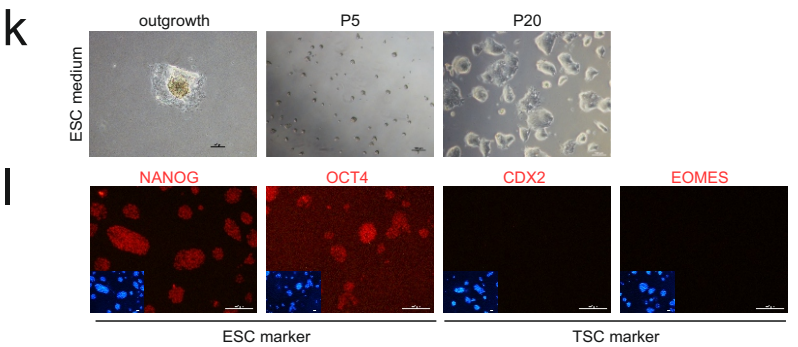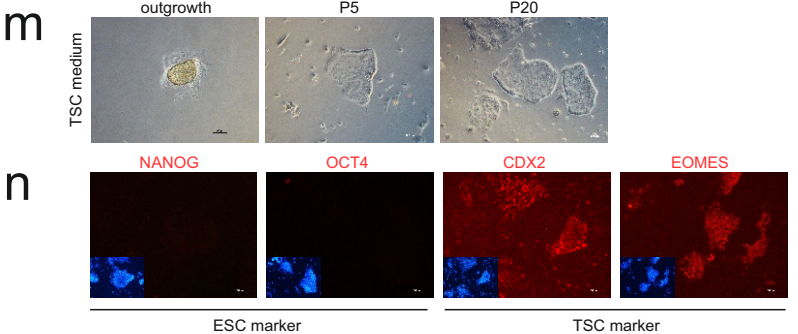

## Supplementary Figure 2 – Flow cytometry, scRNA-Seq and stem cell derivation from RtL-embryoids

**a** Flow cytometry and sorting panels of cells from RtL-embryoids (light red sorting gate ExE-like cells/CD40-APC+; light green sorting gate Epi-like cells/ GFP+; light blue sorting gate VE-like cell/mCherry+). **b – e** scRNA-seq library statistic of data obtained from SMART-seq2 technology. **f** Heatmap showing expression of top 50 differentially expressed genes of VE-like cluster, Epi-like cluster, and ExE-like cluster. Genes are represented in rows, and cells in columns. **g** Transcription factor enrichment analysis showing enrichment score of key transcription factors for VE-like, Epi-like, and ExE-like clusters. **h** UMAP from Fig. 2f identifying original datasets<sup>25,26,27,28</sup> for each cell. **i** Heatmap of cell percentages from RtL-embryoid clusters mapped to the respective cell populations in the reference dataset of Fig. 2f. **j** UMAP of scRNA-seq data of 3D and 2D reprogramming **k – n** Derivation and characterization of ES- and TS- cells obtained by outgrowth culture from RtL-embryoids. NANOG/OCT4/CDX2/EOMES, red; Nuclei staining: Hoechst33342, blue. Scale bars = 100  $\mu$ m. Source data of **f**, **g** and **j** are provided as a Source Data file. Experiments were repeated independently at least three times with similar results (**k - n**).

**a** Heatmap of top 50 most differentially expressed genes

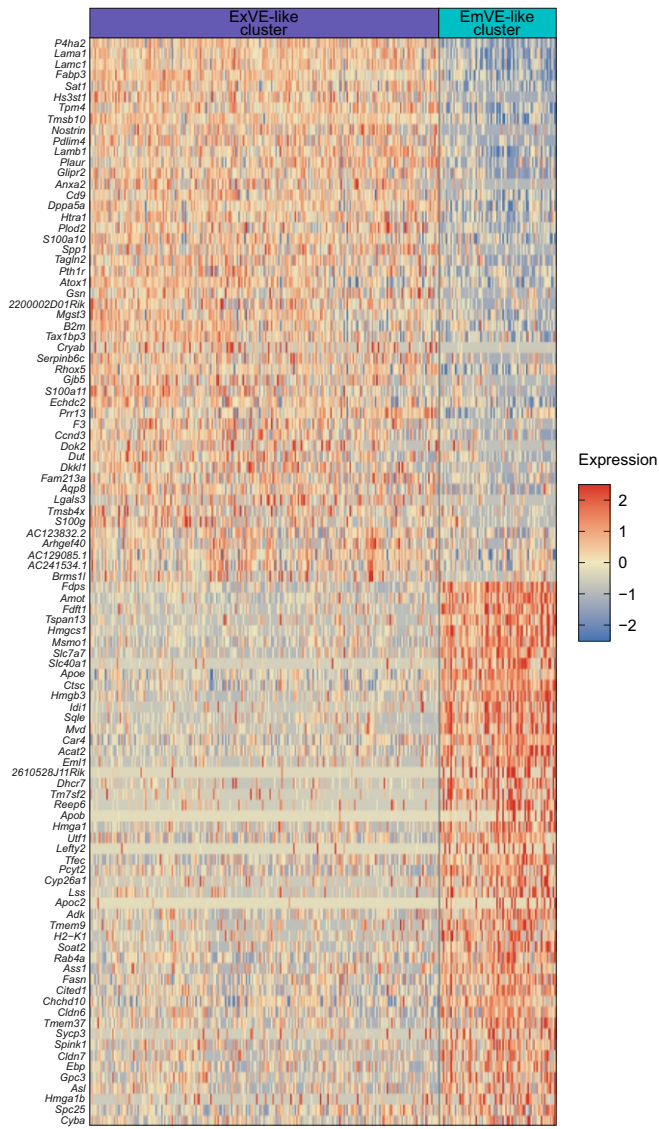

**b**

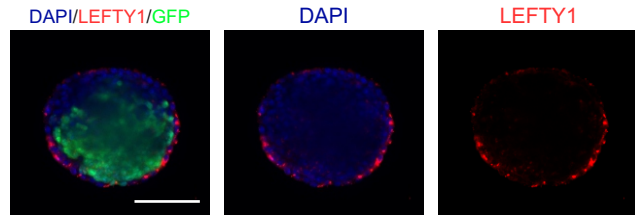

### **Supplementary Figure 3 - Heatmap of variable genes of VE-like subclusters**

**a** Heatmap displaying the top 50 differentially expressed genes for cells of the ExVE-like cluster and EmVE-like cluster. **b** LEFTY1 expression throughout, but predominantly restricted to the EmVE in aggregates with a weak contribution of ExE-like tissue. GFP, green; LEFTY1, red; DAPI, blue. Scale bars = 100  $\mu$ m. Source data of **a** are provided as a Source Data file. Experiments were repeated independently at least three times with similar results (**b**).

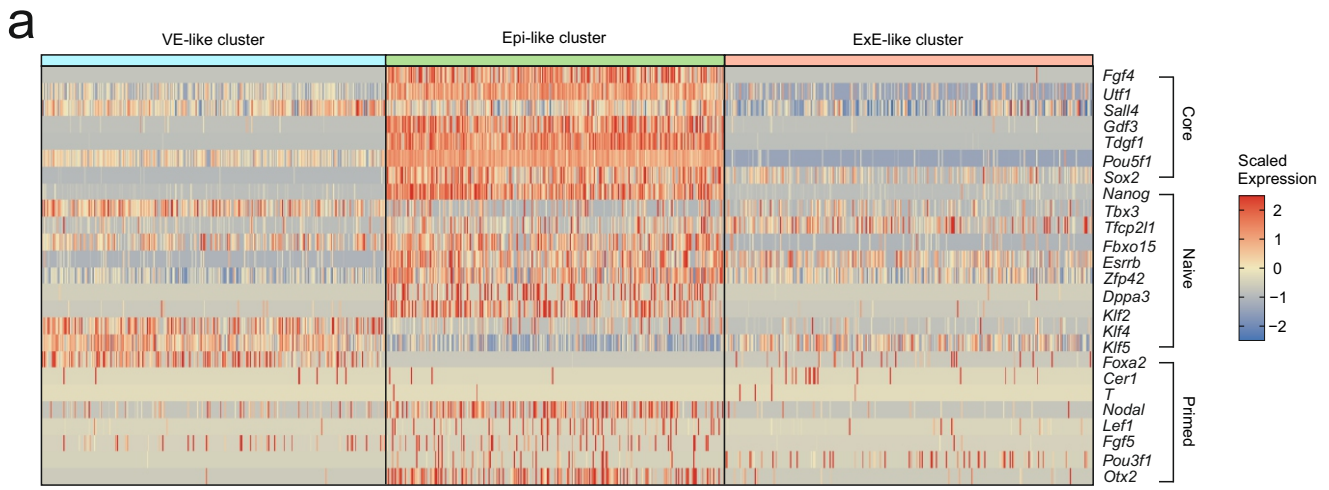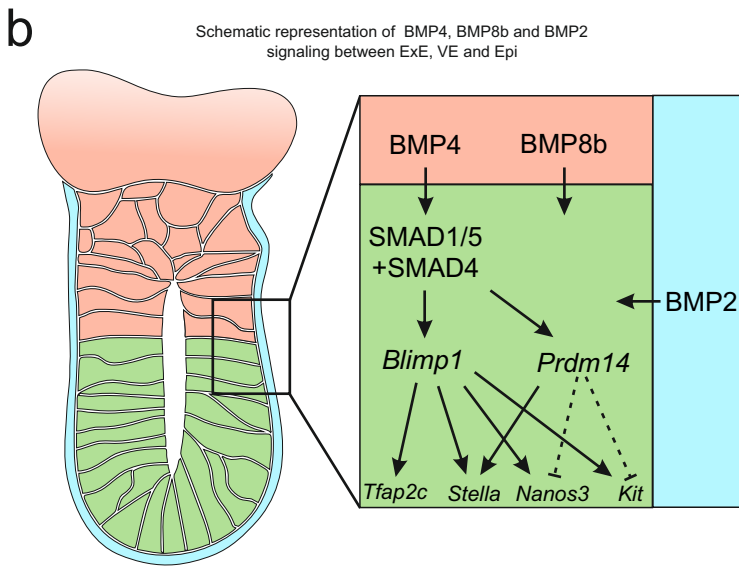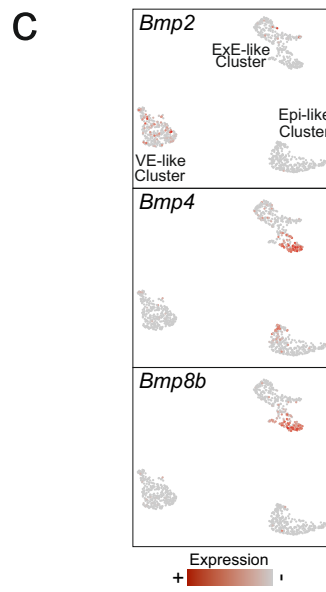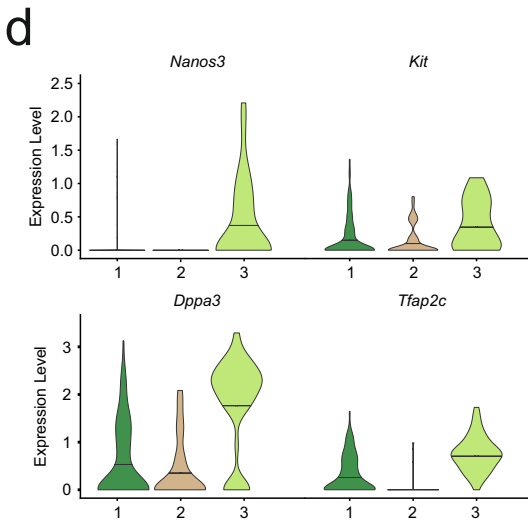

**Supplementary Figure 4 – RtL-embryoids show indications for the induction of the molecular signaling cascade responsible for PGC specification.**

**a** Heatmap showing expression of core-, naïve-, and primed-pluripotency factors across cells of all three compartments comprising RtL-embryoids. **b** Schematic representation of signaling events leading to PGC specification in epiblast of murine embryos starting between E4.5 – E5.5 with the secretion of BMP4, BMP8b from the ExE and BMP2 from the VE. **c** Featureplots mapping expression of *Bmp2* in cells of the VE-like cluster and *Bmp4* and *Bmp8b* in cells of ExE-like cluster. **d** Violinplots showing distinct subpopulation of cells expressing marker genes of PGC specification *Nanos3*, *Kit*, *Dppa3* (*Stella*), and *Tfap2c*, identifying Epi-like subcluster 3 as cells displaying PGC-like cell fate. Source data of **d** are provided as a Source Data file.



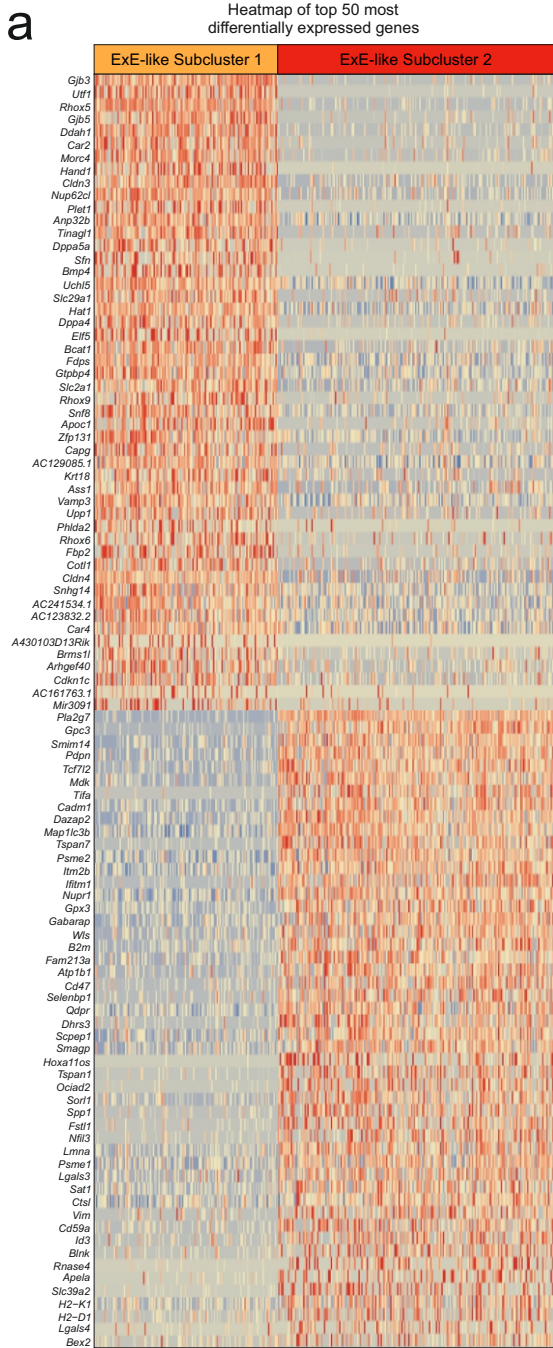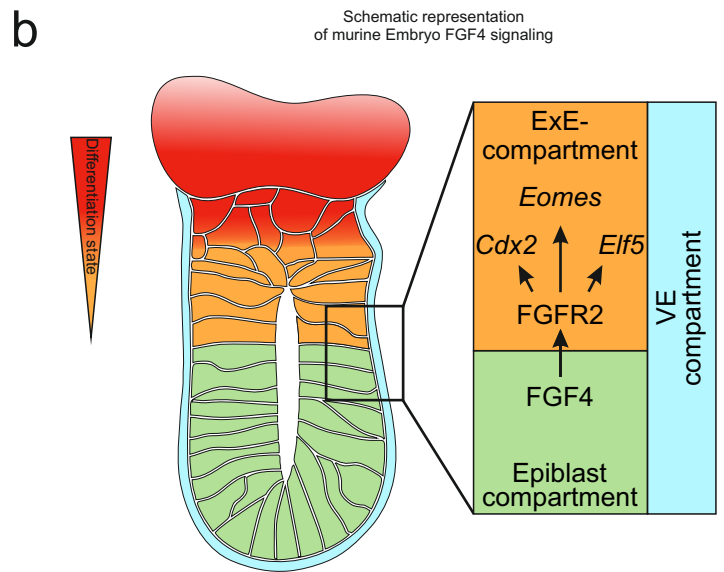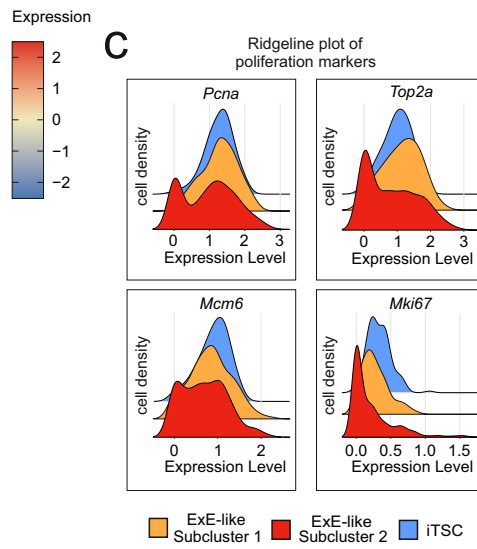

**Supplementary Figure 5 – Detailed analysis and characterization of ExE-like subcluster 1 and 2**

**a** Heatmap depicting the top 50 differentially expressed genes of the two ExE-Subclusters. **b** Schematic representation of FGF4 signaling and downstream targets in ExE compartment in murine embryos ~E5.5. **c** Ridgeline plots of proliferation marker gene expression in the two ExE-like Subcluster and iTSCs obtained from FGF4/Heparin supplemented reprogramming in 2D mono-culture, highlighting the stem cell character of ExE-like Subcluster 1. Source data of **a** are provided as a Source Data file.
